# Supplementary material for: Ultrafast and scalable variant annotation and prioritization with big functional genomics data
Source: PubMed Central journal article supplement — Genome Res. 2020 Dec;30(12):1789–801. doi: 10.1101/gr.267997.120 (PMC7706736; doi:10.1101/gr.267997.120), 2020-12
Supplement: supp_gr.267997.120_Supplemental_Material.pdf [file supp_gr.267997.120_Supplemental_Material.pdf]

# **Supplemental Material**

## **Ultrafast and scalable variant annotation and prioritization with big functional genomics data**

**This file includes: Supplemental Figures S1-S11, Supplemental Tables S1-S6 and the description of Supplemental Codes.**

## Supplemental Figures

|                                                                                                 |           |
|-------------------------------------------------------------------------------------------------|-----------|
| <b>Figure S1. Architecture of VarNote index system .....</b>                                    | <b>3</b>  |
| <b>Figure S2. The construction of VarNote positioning file and index file .....</b>             | <b>4</b>  |
| <b>Figure S3. The VarNote index format .....</b>                                                | <b>5</b>  |
| <b>Figure S4. Process of chromosome sweeping .....</b>                                          | <b>6</b>  |
| <b>Figure S5. The genomic distribution of six query variant datasets .....</b>                  | <b>7</b>  |
| <b>Figure S6. The genomic distribution of three annotation databases .....</b>                  | <b>8</b>  |
| <b>Figure S7. The runtime comparisons of interval-level annotations among six methods .....</b> | <b>9</b>  |
| <b>Figure S8. The runtime comparisons between VarNote and other tools.....</b>                  | <b>10</b> |
| <b>Figure S9. Random-sweep searching algorithm based on Tabix index.....</b>                    | <b>10</b> |
| <b>Figure S10. The runtime comparisons of variant annotation using multi-threading .....</b>    | <b>11</b> |
| <b>Figure S11. The boxplot of rank ratio for PICS causal variant across conditions .....</b>    | <b>12</b> |

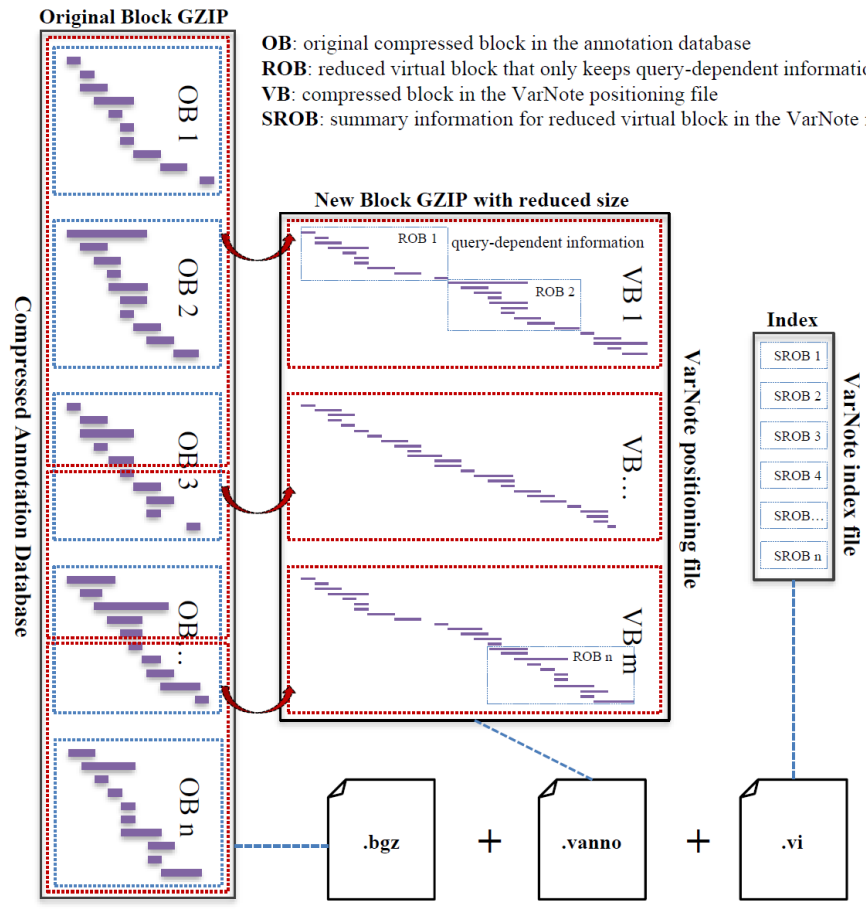

**Supplemental Figure S1.** Architecture of VarNote index system. Bgzip-compressed annotation database (.bgz file) will be firstly converted to VarNote positioning file (.vanno file). The system tailors and encodes information of each original compressed block in the annotation database (OB) to generate reduced virtual block that only keeps query-dependent information (ROB). The bgzip-compressed VarNote positioning file contains concatenate compressed block that stores ROB bytes (VB). Then, summary information of reduced virtual block (SROB) is linearly indexed to generate VarNote index file (.vi file).

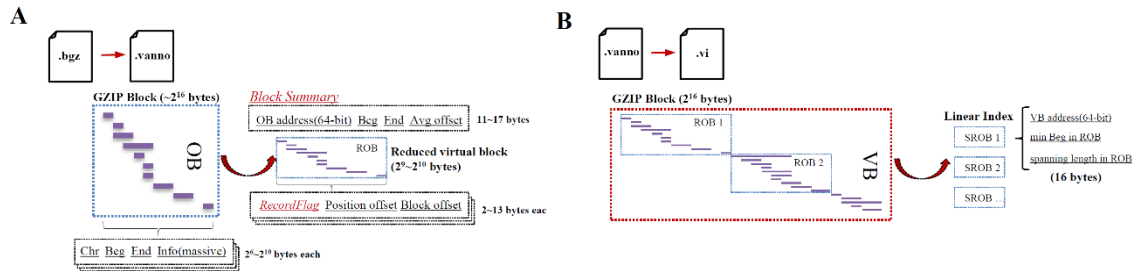

**Supplemental Figure S2.** The construction of VarNote positioning file and index file. (A) ROB transformation. A normal OB usually stores  $2^{16}$  bytes and may contains hundreds to thousands annotation records ( $2^6 \sim 2^{10}$  bytes each). Since the most space-consuming information is annotation metadata that is useless for interval query, the system only need to remember query-dependent information, called ROB. ROB comprises a block summary (11~17 bytes in total, including a unique 64-bit bgzip OB address, position information of first record and average block offset of all records in the current OB) and hundreds to thousands encoded annotation records (2~13 bytes each, including a record flag, position offset and block offset to average). (B) Linear index of ROB. The system indexes the VarNote positioning file by a series of ROB summary information (16 bytes each, including a unique 64-bit bgzip address of ROB start, initial beginning position of ROB and spanning length of all records in ROB).

| Field                                             | Description                                                                                                                                                                                                                                                                     | Type                                  |
|---------------------------------------------------|---------------------------------------------------------------------------------------------------------------------------------------------------------------------------------------------------------------------------------------------------------------------------------|---------------------------------------|
| Block Start Flag                                  | -1 means block start and first record distance is 1;<br>-2 means block start and first record distance is a unsigned byte value;<br>-3 means block start and first record distance is a unsigned short value;<br>-4 means block start and first record distance is a int value. | byte                                  |
| <b>First Record in Block</b>                      |                                                                                                                                                                                                                                                                                 |                                       |
| Block Address                                     | 64-bit bgzip address of record in database file.                                                                                                                                                                                                                                | long                                  |
| Record Distance                                   | Record Distance (End minus Beg), optional (If record distance is greater than one, 1, 2 or 4 bytes are allocated to store the unsigned byte, unsigned short and int distance value respectively).                                                                               | 0, unsigned byte, unsigned short, int |
| Average Offset                                    | Average block offset of all records in this block.                                                                                                                                                                                                                              | short, int                            |
| <b>Other Records in Block</b>                     |                                                                                                                                                                                                                                                                                 |                                       |
| RecordFlag                                        |                                                                                                                                                                                                                                                                                 | byte                                  |
| Record Sign                                       | The 1st bit represents the start of a record flag.                                                                                                                                                                                                                              | bit[0]                                |
| Beg Distance Sign                                 | The 2nd-4th bits encodes the storage size of distance between the current beg and previous (additional bytes are allocated to store the difference).                                                                                                                            | bit[1-3]                              |
| Record Distance Sign                              | The 5th-6th bits encodes the storage size of record distance (additional bytes are allocated to store the difference).                                                                                                                                                          | bit[4-5]                              |
| Direction Sign                                    | The 7th bits encodes direction sign indicates whether the difference of block offset to average is a positive or negative value.                                                                                                                                                | bit[6]                                |
| Storage Size Sign                                 | The 8th bits encodes a sign indicates the storage size of block offset to average (additional bytes are allocated to store the difference).                                                                                                                                     | bit[7]                                |
| Beg Distance                                      | Optional, if the distance between current beg and previous is greater than four, 1, 2 or 4 bytes are allocated to store the unsigned byte, unsigned short and int distance value respectively.                                                                                  | 0, unsigned byte, unsigned short, int |
| Record Distance                                   | Optional, if record distance is greater than one, 1, 2 or 4 bytes are allocated to store the unsigned byte, unsigned short and int distance value respectively.                                                                                                                 | 0, unsigned byte, unsigned short, int |
| Difference between Block Offset to Average Offset | Additional 1-4 bytes are allocated to store the difference, allocating 1, 2 or 4 for unsigned byte, short, int value of difference respectively.                                                                                                                                | unsigned byte, short, int             |
| <b>Summary of Each Block</b>                      |                                                                                                                                                                                                                                                                                 |                                       |
| Block Address                                     | Address of this block in the VarNote file.                                                                                                                                                                                                                                      | long                                  |
| Start Position                                    | The start position (Beg) of the first record in this block.                                                                                                                                                                                                                     | int                                   |
| Block Distance                                    | The max distance of all the records in this block.                                                                                                                                                                                                                              | int                                   |
| <b>Block Count</b>                                |                                                                                                                                                                                                                                                                                 |                                       |
| Block Count                                       | Total block in current chromosome                                                                                                                                                                                                                                               | int                                   |

**Supplemental Figure S3.** The VarNote index format (including .vanno and .vi files). The original database file should be bgzip-compressed.

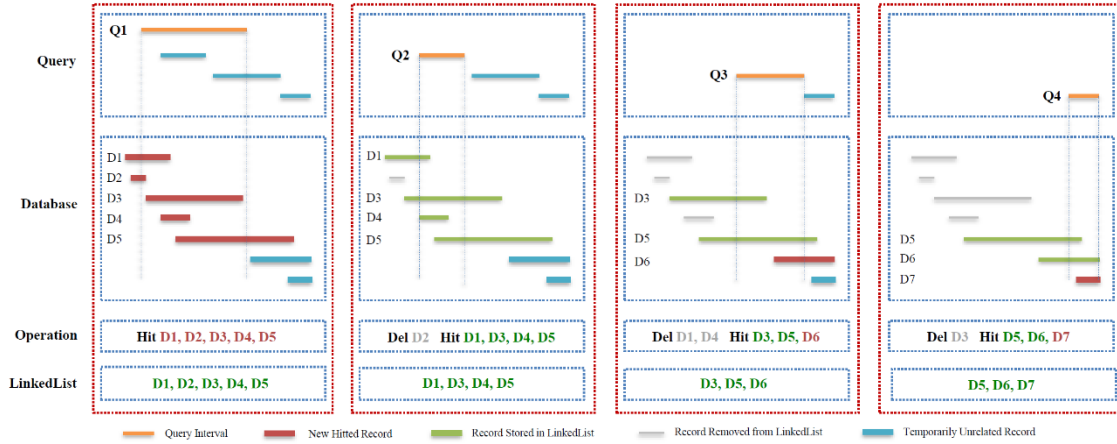

**Supplemental Figure S4.** Process of chromosome sweeping. Suppose there are four query intervals (Q1-Q4, some of them overlap each other) and seven annotation records in the database (D1-D7, some of them overlap each other), VarNote sequentially intersects Q1 with annotation records to identify all record hits (Hit D1, D2, D3, D4, D5). A global linked list is used to cache these intersected records in case next query interval encounters. Then, VarNote processes Q2 by firstly inspecting whether there are any overlaps in the global linked list (Hit D1, D3, D4, D5), and then dropping useless cached records from the global linked list (Del D2). The algorithm continues to sweep and cache the following annotation records for Q2 (no hit). Iteratively, VarNote accurately finds all intersections for Q3 (hit D3, D5, D6), deletes never used records from the global linked list (Del D1, D4) until the last query interval ends.

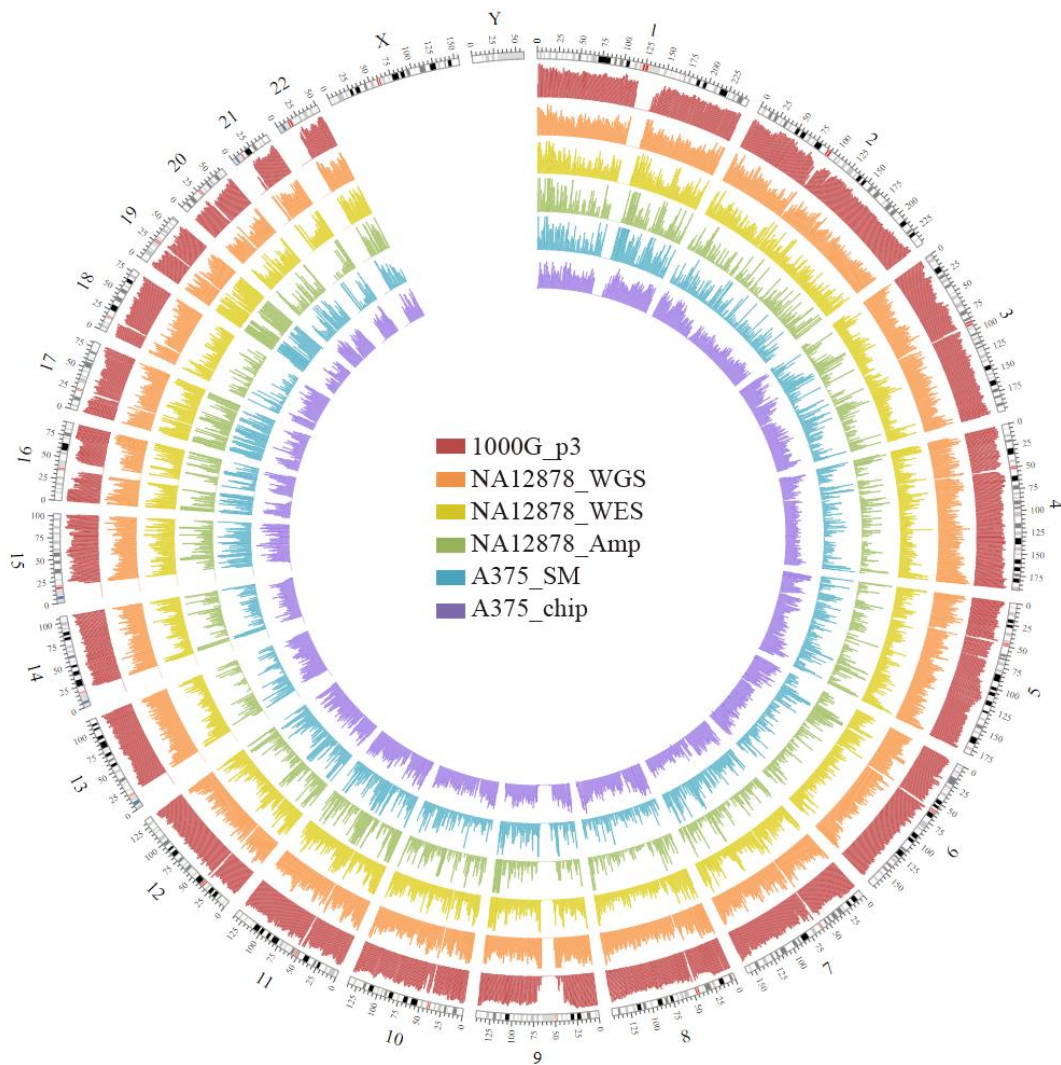

**Supplemental Figure S5.** The genomic distribution of six query variant datasets across the human reference genome, including variant call result of 1000 Genomes project phase3 (1000G\_p3), variant call result of 10X Genomics Chromium whole genome sequencing for NA12878 (NA12878\_WGS), variant call result of Nextera Rapid Capture Exome and Expanded Exome whole exome sequencing for NA12878 (NA12878\_WES), variant call result of Ion Ampliseq Exome capture sequencing data for NA12878 (NA12878\_Amp), genotype call result of Affymetrix Genome-Wide Human SNP Array 6.0 data for A375 cell line (A375\_chip) and somatic mutation call result of whole exome sequencing data for A375 cell line (A375\_SM). These datasets span the highly unbalanced and sparse queries to the highly balanced and dense queries.



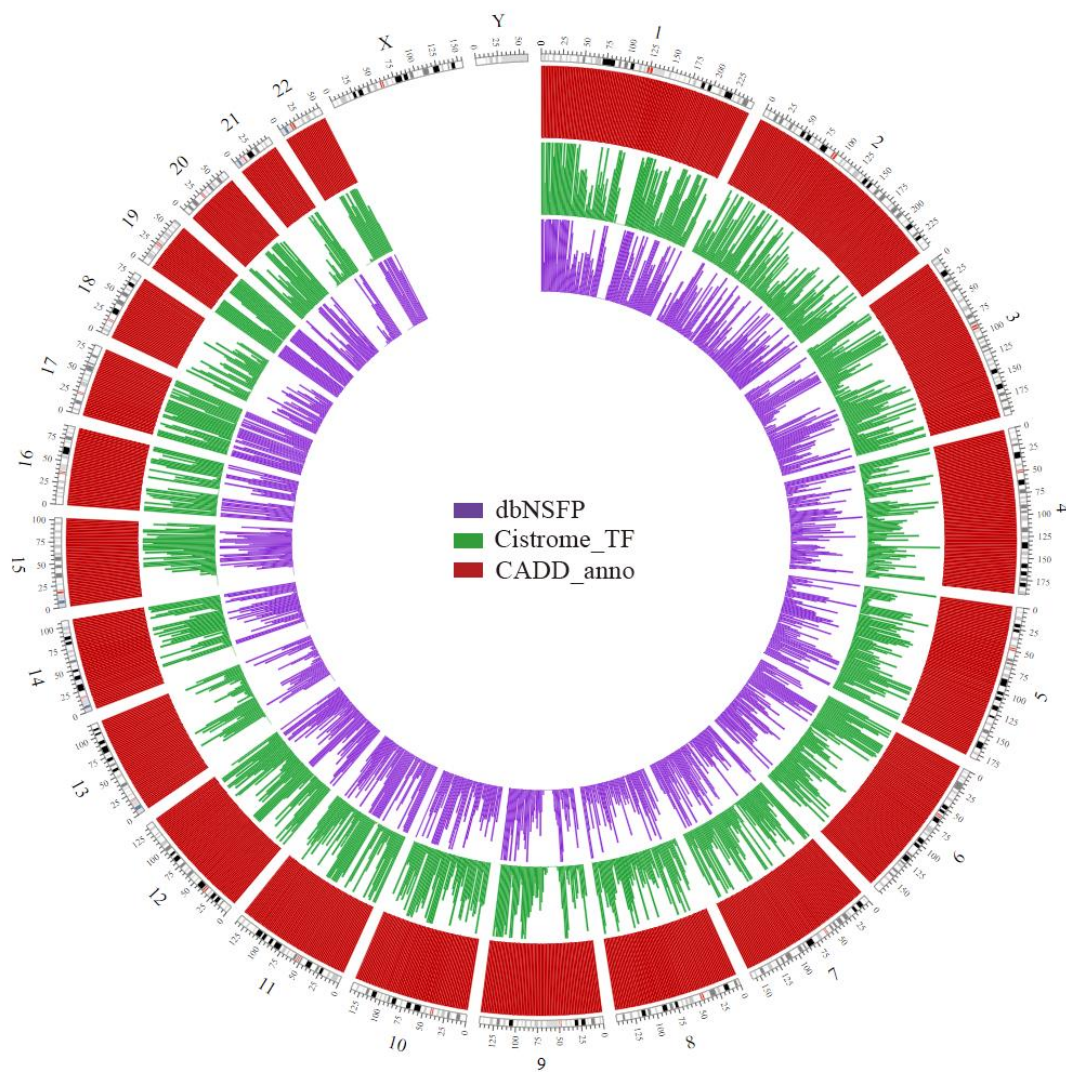

**Supplemental Figure S6.** The genomic distribution of three annotation databases across human reference genome, including functional prediction and annotation of all potential non-synonymous SNVs (dbNSFP), Cistrome aggregated ChIP-seq peak calling result of human transcription factors (Cistrome\_TF), CADD deleteriousness score and related annotation of all possible SNVs (CADD\_anno).



|                           |       |       |       |       |       |       |       |
|---------------------------|-------|-------|-------|-------|-------|-------|-------|
| 1000G_p3 : CADD_anno      | 1.4E5 | 2.2E4 | 2.3E4 | 6.2E5 | 6.2E5 | 1.5E5 | 1.1E4 |
| NA12878_WGS : CADD_anno   | 7.6E4 | 2.2E4 | 2.6E4 | 3.3E5 | 1.4E4 | 9.8E4 | 2E3   |
| NA12878_WES : CADD_anno   | 7.5E4 | 2.2E4 | 2.3E4 | 3E4   | 1.2E3 | 1E5   | 352   |
| A375_chip : CADD_anno     | 7.4E4 | 2E4   | 2.2E4 | 5.7E4 | 2.5E3 | 1E5   | 599   |
| NA12878_Amp : CADD_anno   | 7.5E4 | 2.2E4 | 2.3E4 | 5.6E3 | 151   | 2.8E4 | 50    |
| A375_SM : CADD_anno       | 8E4   | 2.1E4 | 2.3E4 | 4.3E3 | 271   | 3.8E4 | 76    |
| 1000G_p3 : CADD_score     | 1.3E4 | 3.3E3 | 3.2E3 | 5.4E4 | 3.1E5 | 3.3E4 | 2.5E3 |
| NA12878_WGS : CADD_score  | 6.2E3 | 3.3E3 | 3.5E3 | 2.9E4 | 8E3   | 1.5E4 | 1E3   |
| NA12878_WES : CADD_score  | 6E3   | 3.2E3 | 2.9E3 | 2.4E3 | 695   | 1E4   | 142   |
| A375_chip : CADD_score    | 6.2E3 | 3E3   | 3.2E3 | 5.4E3 | 1.6E3 | 1.2E4 | 147   |
| NA12878_Amp : CADD_score  | 6.4E3 | 3.2E3 | 3.2E3 | 482   | 98    | 2.9E3 | 19    |
| A375_SM : CADD_score      | 6.7E3 | 3.2E3 | 3.3E3 | 448   | 172   | 5.3E3 | 39    |
| 1000G_p3 : dbNSFP         | 2E3   | 676   | 751   | 2E5   | 4.3E4 | 2.7E3 | 374   |
| NA12878_WGS : dbNSFP      | 1.3E3 | 628   | 727   | 1.1E4 | 2.7E3 | 1.7E3 | 76    |
| NA12878_WES : dbNSFP      | 1.3E3 | 530   | 516   | 1.8E3 | 242   | 1.6E3 | 21    |
| A375_chip : dbNSFP        | 1.3E3 | 509   | 546   | 1.8E3 | 441   | 1.7E3 | 9     |
| NA12878_Amp : dbNSFP      | 1.3E3 | 540   | 573   | 714   | 58    | 1.2E3 | 18    |
| A375_SM : dbNSFP          | 1.6E3 | 526   | 567   | 430   | 48    | 1.5E3 | 16    |
| 1000G_p3 : Cistrome_TF    | 3.1E3 | 1.6E3 | 2.3E3 | 2E5   | 2.3E5 | 2.4E3 | 8.7E3 |
| NA12878_WGS : Cistrome_TF | 536   | 218   | 256   | 1.3E4 | 1.4E4 | 982   | 951   |
| NA12878_WES : Cistrome_TF | 219   | 95    | 102   | 1.1E3 | 1.4E3 | 827   | 87    |
| A375_chip : Cistrome_TF   | 230   | 81    | 104   | 2.1E3 | 2.3E3 | 893   | 124   |
| NA12878_Amp : Cistrome_TF | 223   | 94    | 103   | 239   | 218   | 401   | 17    |
| A375_SM : Cistrome_TF     | 225   | 81    | 106   | 185   | 159   | 499   | 19    |

Seconds fast slow

BEDTools BEDOPS BCFtools VEP GIGGLE vcfanno VarNote

**Supplemental Figure S7.** The runtime comparisons of interval-level annotations among six methods. Six query variant datasets (A375\_SM, NA12878\_Amp, A375\_chip, NA12878\_WES, NA12878\_WGS and 1000G\_p3) and four genome-wide annotation databases (Cistrome\_TF, dbNSFP, CADD\_score and CADD\_anno) were used.

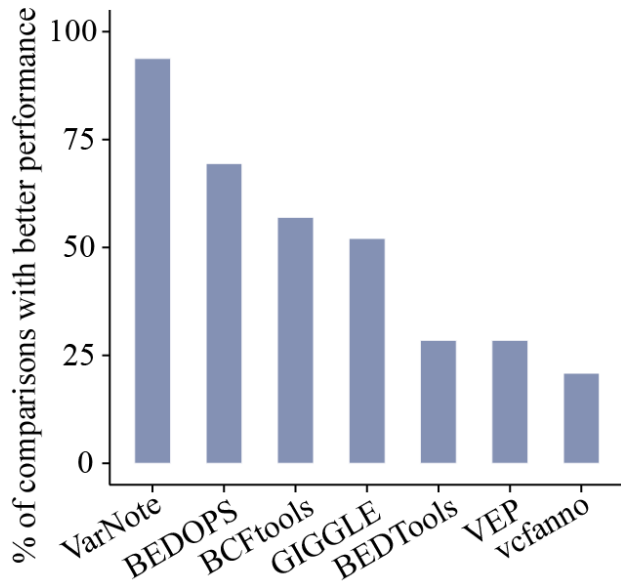

**Supplemental Figure S8.** The runtime comparisons between VarNote and other tools for 144 benchmarks. VarNote outperforms other method in 93.75% comparisons, with only nine evaluations are slightly behindhand in seconds for small queries or databases.

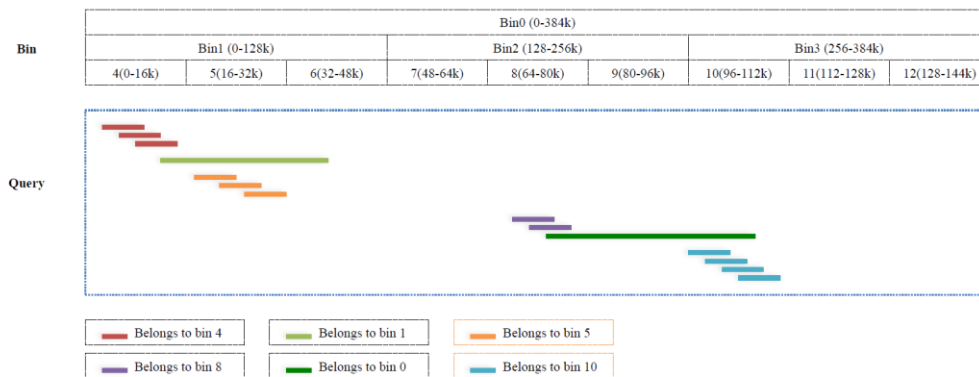

**Supplemental Figure S9.** Random-sweep searching algorithm based on Tabix index implemented by VarNote. Each chromosome is partitioned into bins span 128kb intervals. Query intervals belonging to separate bins will be grouped together. Tabix algorithm is used to identify and merge associated bins. VarNote chromosome-sweep algorithm is used to intersect annotation records across associated bins.

|                         | 4-threads |       |         |             |         | 8-threads |       |         |             |         |
|-------------------------|-----------|-------|---------|-------------|---------|-----------|-------|---------|-------------|---------|
| NA12878_WGS : CADD_anno | 2.1E4     | 1.4E5 | 5.1E4   | 1.5E4       | 618     | 2.1E4     | 8.1E4 | 3.6E4   | 7.8E3       | 304     |
| NA12878_WES : CADD_anno | 2.1E4     | 1.3E4 | 3.7E4   | 1.4E4       | 58      | 2.1E4     | 7.1E3 | 2.1E4   | 7.1E3       | 31      |
| NA12878_Amp : CADD_anno | 2.1E4     | 1.8E3 | 1.6E4   | 3.1E3       | 13      | 2.1E4     | 1.1E3 | 6.3E3   | 1.5E3       | 8       |
| NA12878_WGS : gnomAD    | 4.1E3     | 1.7E4 | 1.8E3   | 1.9E3       | 622     | 4.1E3     | 1E4   | 1.3E3   | 940         | 305     |
| NA12878_WES : gnomAD    | 3.8E3     | 1.5E3 | 1.3E3   | 1.5E3       | 52      | 3.8E3     | 892   | 770     | 725         | 29      |
| NA12878_Amp : gnomAD    | 3.9E3     | 238   | 504     | 358         | 13      | 3.8E3     | 149   | 425     | 190         | 7       |
| NA12878_WGS : dbNSFP    | 596       | 4.1E3 | 945     | 367         | 24      | 597       | 2.8E3 | 672     | 180         | 15      |
| NA12878_WES : dbNSFP    | 500       | 715   | 582     | 277         | 7       | 496       | 464   | 377     | 148         | 5       |
| NA12878_Amp : dbNSFP    | 500       | 240   | 532     | 169         | 6       | 501       | 165   | 484     | 93          | 4       |
|                         |           |       |         |             |         |           |       |         |             |         |
|                         | 1-thread  |       |         |             |         | 2-threads |       |         |             |         |
| NA12878_WGS : CADD_anno | 2.1E4     | 3.2E5 | 9.6E4   | 5.3E4       | 2E3     | 2.1E4     | 2.3E5 | 6.2E4   | 2.7E4       | 1.2E3   |
| NA12878_WES : CADD_anno | 2.1E4     | 2.8E4 | 1.1E5   | 4.3E4       | 404     | 2.1E4     | 2E4   | 6.1E4   | 2.7E4       | 111     |
| NA12878_Amp : CADD_anno | 2.1E4     | 5E3   | 3.1E4   | 9.8E3       | 102     | 2.1E4     | 2.9E3 | 1.7E4   | 5.5E3       | 22      |
| NA12878_WGS : gnomAD    | 4.2E3     | 4.1E4 | 4.5E3   | 6E3         | 1.9E3   | 4.3E3     | 2.8E4 | 2.4E3   | 3.2E3       | 1.1E3   |
| NA12878_WES : gnomAD    | 3.9E3     | 3.5E3 | 4.4E3   | 4.7E3       | 169     | 4.3E3     | 2.5E3 | 2.3E3   | 2.7E3       | 105     |
| NA12878_Amp : gnomAD    | 3.8E3     | 633   | 1.4E3   | 1.2E3       | 36      | 3.9E3     | 375   | 824     | 567         | 21      |
| NA12878_WGS : dbNSFP    | 602       | 8.8E3 | 1.7E3   | 976         | 95      | 602       | 6.3E3 | 1E3     | 568         | 46      |
| NA12878_WES : dbNSFP    | 497       | 1.5E3 | 1.7E3   | 856         | 20      | 495       | 1.1E3 | 960     | 474         | 11      |
| NA12878_Amp : dbNSFP    | 494       | 560   | 1.1E3   | 543         | 30      | 494       | 355   | 642     | 281         | 10      |
|                         | BCFtools  | VEP   | vcfanno | VarNote-tbi | VarNote | BCFtools  | VEP   | vcfanno | VarNote-tbi | VarNote |

**Supplemental Figure S10.** The runtime comparisons of variant annotation using multi-threading. Three variant call results as query datasets (NA12878\_Amp, NA12878\_WES and NA12878\_WGS) and three genome-wide annotation databases (dbNSFP, gnomAD and CADD\_anno) were used. VarNote-tbi is the new multi-threading algorithm only based on Tabix index.

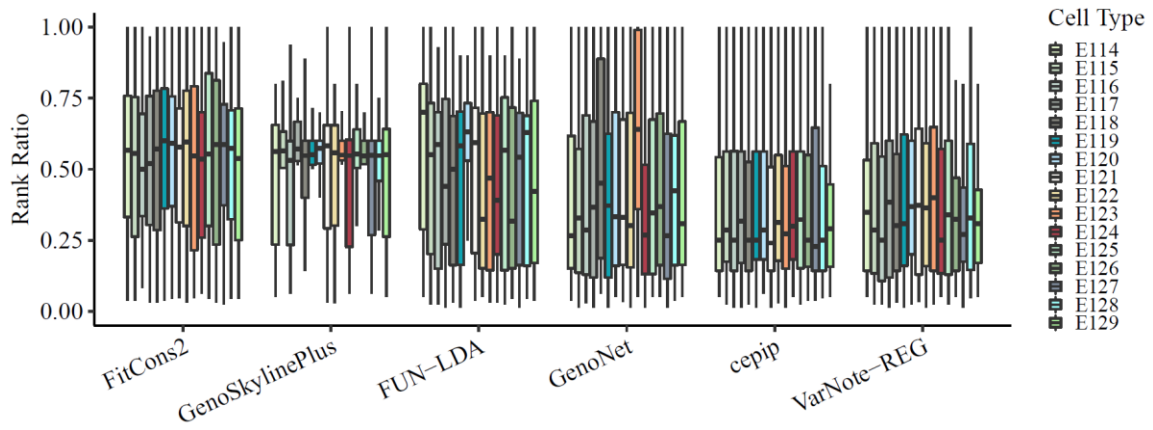

**Supplemental Figure S11.** The boxplot of rank ratio for each PICS causal variant in the GWAS signals across 16 ENCODE cell types and six different prioritization methods, the rank ratio is measured by the rank of observed variant/total number of investigated variants (including extended highly-linked variant in LD) in each GWAS signal.

## Supplemental Tables

|                                                                                                  |           |
|--------------------------------------------------------------------------------------------------|-----------|
| <b>Table S1. The query datasets and annotation databases for performance evaluation .....</b>    | <b>14</b> |
| <b>Table S2. The software and running parameters for interval-level overlap annotation .....</b> | <b>15</b> |
| <b>Table S3. Summary information of 144 runtime comparisons .....</b>                            | <b>16</b> |
| <b>Table S4. The running parameters used in the evaluation of variant-level annotation.....</b>  | <b>19</b> |
| <b>Table S5. The curation list of rare pathogenic regulatory variants.....</b>                   | <b>20</b> |
| <b>Table S6. The pseudocode of VarNote random-sweep searching algorithm .....</b>                | <b>22</b> |

**Supplemental Table S1.** The query datasets and annotation databases used in the performance evaluation

|                             | <b>Dataset</b> | <b>Source</b>                                                                                                                                                                                                                                                                                                                                                                                                                    |
|-----------------------------|----------------|----------------------------------------------------------------------------------------------------------------------------------------------------------------------------------------------------------------------------------------------------------------------------------------------------------------------------------------------------------------------------------------------------------------------------------|
| <b>Query Datasets</b>       | 1000G_p3       | Variant call result of 1000 Genomes project phase3:<br><a href="ftp://ftp.1000genomes.ebi.ac.uk/vol1/ftp/release/20130502/ALL.wgs.phase3_shapeit2_mvncall_integrated_v5b.20130502.sites.vcf.gz">ftp://ftp.1000genomes.ebi.ac.uk/vol1/ftp/release/20130502/ALL.wgs.phase3_shapeit2_mvncall_integrated_v5b.20130502.sites.vcf.gz</a>                                                                                               |
|                             | NA12878_WGS    | Variant call result of 10X Genomics Chromium whole genome sequencing for NA12878 from GIAB:<br><a href="ftp://ftp-trace.ncbi.nlm.nih.gov/giab/ftp/data/NA12878/10Xgenomics_ChromiumGenome_LongRanger2.1_09302016/NA12878_hg19/NA12878_hg19_phased_variants.vcf.gz">ftp://ftp-trace.ncbi.nlm.nih.gov/giab/ftp/data/NA12878/10Xgenomics_ChromiumGenome_LongRanger2.1_09302016/NA12878_hg19/NA12878_hg19_phased_variants.vcf.gz</a> |
|                             | NA12878_WES    | Variant call result of Nextera Rapid Capture Exome and Expanded Exome whole exome sequencing for NA12878 from GIAB:<br><a href="ftp://ftp-trace.ncbi.nlm.nih.gov/giab/ftp/data/NA12878/Garvan_NA12878_HG001_HiSeq_Exome/project.NIST.hc.snps.indels.vcf">ftp://ftp-trace.ncbi.nlm.nih.gov/giab/ftp/data/NA12878/Garvan_NA12878_HG001_HiSeq_Exome/project.NIST.hc.snps.indels.vcf</a>                                             |
|                             | NA12878_Amp    | Variant call result of Ion Ampliseq Exome capture sequencing data for NA12878 from GIAB:<br><a href="ftp://ftp-trace.ncbi.nlm.nih.gov/giab/ftp/data/NA12878/analysis/IonTorrent_TVC_04302015/TSV_C_variants.vcf">ftp://ftp-trace.ncbi.nlm.nih.gov/giab/ftp/data/NA12878/analysis/IonTorrent_TVC_04302015/TSV_C_variants.vcf</a>                                                                                                  |
|                             | A375_chip      | Genotype call result of Affymetrix Genome-Wide Human SNP Array 6.0 data for A375 cell line from GDSC:<br><a href="https://www.cancerrxgene.org/">https://www.cancerrxgene.org/</a>                                                                                                                                                                                                                                               |
|                             | A375_SM        | Somatic mutation call result of whole exome sequencing data for A375 cell line from GDSC:<br><a href="https://www.cancerrxgene.org/">https://www.cancerrxgene.org/</a>                                                                                                                                                                                                                                                           |
| <b>Annotation Databases</b> | CADD_score     | CADD v1.3 raw score and PHRED score for all possible SNVs (80G):<br><a href="https://krishna.gs.washington.edu/download/CADD/v1.3/whole_genome_SNVs.tsv.gz">https://krishna.gs.washington.edu/download/CADD/v1.3/whole_genome_SNVs.tsv.gz</a>                                                                                                                                                                                    |
|                             | CADD_anno      | CADD v1.3 all annotations for all possible SNVs (344G):<br><a href="https://krishna.gs.washington.edu/download/CADD/v1.3/whole_genome_SNVs_inclAnnotations.tsv.gz">https://krishna.gs.washington.edu/download/CADD/v1.3/whole_genome_SNVs_inclAnnotations.tsv.gz</a>                                                                                                                                                             |
|                             | dbNSFP         | dbNSFP v3.4a all functional predictions (16G):<br><a href="ftp://dbnsfp:dbnsfp@dbnsfp.softgenetics.com/dbNSFPv3.4a.zip">ftp://dbnsfp:dbnsfp@dbnsfp.softgenetics.com/dbNSFPv3.4a.zip</a>                                                                                                                                                                                                                                          |
|                             | gnomAD         | gnomAD r2.0.2 Genomes all known variants (86G):<br><a href="https://gnomad.broadinstitute.org/">https://gnomad.broadinstitute.org/</a>                                                                                                                                                                                                                                                                                           |
|                             | Cistrome_TF    | CistromeDB 20181120 aggregated human transcription regulator CHIP-seq peaks (12G):<br><a href="http://cistrome.org/db">http://cistrome.org/db</a>                                                                                                                                                                                                                                                                                |

**Supplemental Table S2.** The software information and running parameters used in the evaluation of interval-level overlap annotation

| Tool     | Version                     | Command line                                                                                                                                         |
|----------|-----------------------------|------------------------------------------------------------------------------------------------------------------------------------------------------|
| BCFtools | 1.6 (using<br>htslib 1.6)   | bcftools annotate -a {DATABASE FILE} -c CHROM,FROM,TO,ANN -h {HEADER FILE} --threads 1 {QUERY FILE}                                                  |
| BEDOPS   | 2.4.37<br>(megarow)         | bedops -i {QUERY FILE} {DATABASE FILE}                                                                                                               |
| BEDTools | v2.27.1                     | bedtools intersect -wa -wb -a {QUERY FILE} -b {DATABASE File} -sorted                                                                                |
| GIGGLE   | v0.6.3                      | giggle search -i {DATABASE INDEX DIRECTORY} -q {QUERY FILE} -o -v                                                                                    |
| vcfanno  | 0.2.8 (built<br>with go1.8) | vcfanno -p 1 {DATABASE CONFIGURE FILE} {QUERY FILE}                                                                                                  |
| VEP      | 91.1                        | vep --dir {VEP DATABASE DIRECTORY} --assembly GRCh37 --vcf --format vcf -i {QUERY FILE} -custom {DATABASE FILE},ANN,bed,overlap,1 --offline --fork 1 |
| VarNote  | v1.1                        | java -jar VarNote.jar Intersect -Q {QUERY FILE} -D {DATABASE FILE} -T 1                                                                              |



**Supplemental Table S3.** Summary information of 144 runtime comparisons between VarNote and other methods

| Comparison           | Test datasets             | VarNote runtime (seconds) | Compared tool runtime (seconds) | Speedup |
|----------------------|---------------------------|---------------------------|---------------------------------|---------|
| VarNote vs. BCFtools | 1000G_p3 vs. CADD_anno    | 11356.00                  | 22665.00                        | 2.00    |
| VarNote vs. BEDOPS   | 1000G_p3 vs. CADD_anno    | 11356.00                  | 21895.00                        | 1.93    |
| VarNote vs. BEDTools | 1000G_p3 vs. CADD_anno    | 11356.00                  | 138318.00                       | 12.18   |
| VarNote vs. GIGGLE   | 1000G_p3 vs. CADD_anno    | 11356.00                  | 624065.00                       | 54.95   |
| VarNote vs. VEP      | 1000G_p3 vs. CADD_anno    | 11356.00                  | 618069.52                       | 54.43   |
| VarNote vs. vcfanno  | 1000G_p3 vs. CADD_anno    | 11356.00                  | 150495.00                       | 13.25   |
| VarNote vs. BCFtools | 1000G_p3 vs. CADD_score   | 2492.52                   | 3196.39                         | 1.28    |
| VarNote vs. BEDOPS   | 1000G_p3 vs. CADD_score   | 2492.52                   | 3316.72                         | 1.33    |
| VarNote vs. BEDTools | 1000G_p3 vs. CADD_score   | 2492.52                   | 13386.00                        | 5.37    |
| VarNote vs. GIGGLE   | 1000G_p3 vs. CADD_score   | 2492.52                   | 307813.00                       | 123.49  |
| VarNote vs. VEP      | 1000G_p3 vs. CADD_score   | 2492.52                   | 53617.49                        | 21.51   |
| VarNote vs. vcfanno  | 1000G_p3 vs. CADD_score   | 2492.52                   | 33408.05                        | 13.40   |
| VarNote vs. BCFtools | 1000G_p3 vs. Cistrome_TF  | 8681.00                   | 2343.35                         | 0.27    |
| VarNote vs. BEDOPS   | 1000G_p3 vs. Cistrome_TF  | 8681.00                   | 1613.43                         | 0.19    |
| VarNote vs. BEDTools | 1000G_p3 vs. Cistrome_TF  | 8681.00                   | 3138.06                         | 0.36    |
| VarNote vs. GIGGLE   | 1000G_p3 vs. Cistrome_TF  | 8681.00                   | 234685.00                       | 27.03   |
| VarNote vs. VEP      | 1000G_p3 vs. Cistrome_TF  | 8681.00                   | 202897.00                       | 23.37   |
| VarNote vs. vcfanno  | 1000G_p3 vs. Cistrome_TF  | 8681.00                   | 2438.10                         | 0.28    |
| VarNote vs. BCFtools | 1000G_p3 vs. dbNSFP       | 374.20                    | 750.69                          | 2.01    |
| VarNote vs. BEDOPS   | 1000G_p3 vs. dbNSFP       | 374.20                    | 675.86                          | 1.81    |
| VarNote vs. BEDTools | 1000G_p3 vs. dbNSFP       | 374.20                    | 2007.84                         | 5.37    |
| VarNote vs. GIGGLE   | 1000G_p3 vs. dbNSFP       | 374.20                    | 42901.00                        | 114.65  |
| VarNote vs. VEP      | 1000G_p3 vs. dbNSFP       | 374.20                    | 202757.00                       | 541.84  |
| VarNote vs. vcfanno  | 1000G_p3 vs. dbNSFP       | 374.20                    | 2661.92                         | 7.11    |
| VarNote vs. BCFtools | A375_SM vs. CADD_anno     | 75.99                     | 22865.00                        | 300.89  |
| VarNote vs. BEDOPS   | A375_SM vs. CADD_anno     | 75.99                     | 21054.00                        | 277.06  |
| VarNote vs. BEDTools | A375_SM vs. CADD_anno     | 75.99                     | 79781.00                        | 1049.89 |
| VarNote vs. GIGGLE   | A375_SM vs. CADD_anno     | 75.99                     | 270.60                          | 3.56    |
| VarNote vs. VEP      | A375_SM vs. CADD_anno     | 75.99                     | 4338.00                         | 57.09   |
| VarNote vs. vcfanno  | A375_SM vs. CADD_anno     | 75.99                     | 38313.00                        | 504.18  |
| VarNote vs. BCFtools | A375_SM vs. CADD_score    | 38.99                     | 3321.12                         | 85.18   |
| VarNote vs. BEDOPS   | A375_SM vs. CADD_score    | 38.99                     | 3215.11                         | 82.46   |
| VarNote vs. BEDTools | A375_SM vs. CADD_score    | 38.99                     | 6656.00                         | 170.71  |
| VarNote vs. GIGGLE   | A375_SM vs. CADD_score    | 38.99                     | 171.71                          | 4.40    |
| VarNote vs. VEP      | A375_SM vs. CADD_score    | 38.99                     | 447.71                          | 11.48   |
| VarNote vs. vcfanno  | A375_SM vs. CADD_score    | 38.99                     | 5344.13                         | 137.06  |
| VarNote vs. BCFtools | A375_SM vs. Cistrome_TF   | 19.04                     | 106.42                          | 5.59    |
| VarNote vs. BEDOPS   | A375_SM vs. Cistrome_TF   | 19.04                     | 80.52                           | 4.23    |
| VarNote vs. BEDTools | A375_SM vs. Cistrome_TF   | 19.04                     | 224.79                          | 11.81   |
| VarNote vs. GIGGLE   | A375_SM vs. Cistrome_TF   | 19.04                     | 158.60                          | 8.33    |
| VarNote vs. VEP      | A375_SM vs. Cistrome_TF   | 19.04                     | 185.04                          | 9.72    |
| VarNote vs. vcfanno  | A375_SM vs. Cistrome_TF   | 19.04                     | 499.15                          | 26.22   |
| VarNote vs. BCFtools | A375_SM vs. dbNSFP        | 15.65                     | 567.43                          | 36.26   |
| VarNote vs. BEDOPS   | A375_SM vs. dbNSFP        | 15.65                     | 526.01                          | 33.61   |
| VarNote vs. BEDTools | A375_SM vs. dbNSFP        | 15.65                     | 1570.74                         | 100.37  |
| VarNote vs. GIGGLE   | A375_SM vs. dbNSFP        | 15.65                     | 47.72                           | 3.05    |
| VarNote vs. VEP      | A375_SM vs. dbNSFP        | 15.65                     | 429.66                          | 27.45   |
| VarNote vs. vcfanno  | A375_SM vs. dbNSFP        | 15.65                     | 1528.87                         | 97.69   |
| VarNote vs. BCFtools | A375_chip vs. CADD_anno   | 599.43                    | 21648.00                        | 36.11   |
| VarNote vs. BEDOPS   | A375_chip vs. CADD_anno   | 599.43                    | 20461.00                        | 34.13   |
| VarNote vs. BEDTools | A375_chip vs. CADD_anno   | 599.43                    | 74452.00                        | 124.20  |
| VarNote vs. GIGGLE   | A375_chip vs. CADD_anno   | 599.43                    | 2500.85                         | 4.17    |
| VarNote vs. VEP      | A375_chip vs. CADD_anno   | 599.43                    | 57313.00                        | 95.61   |
| VarNote vs. vcfanno  | A375_chip vs. CADD_anno   | 599.43                    | 100672.00                       | 167.95  |
| VarNote vs. BCFtools | A375_chip vs. CADD_score  | 146.93                    | 3207.64                         | 21.83   |
| VarNote vs. BEDOPS   | A375_chip vs. CADD_score  | 146.93                    | 3020.57                         | 20.56   |
| VarNote vs. BEDTools | A375_chip vs. CADD_score  | 146.93                    | 6161.00                         | 41.93   |
| VarNote vs. GIGGLE   | A375_chip vs. CADD_score  | 146.93                    | 1570.83                         | 10.69   |
| VarNote vs. VEP      | A375_chip vs. CADD_score  | 146.93                    | 5398.00                         | 36.74   |
| VarNote vs. vcfanno  | A375_chip vs. CADD_score  | 146.93                    | 12372.27                        | 84.21   |
| VarNote vs. BCFtools | A375_chip vs. Cistrome_TF | 124.04                    | 103.91                          | 0.84    |
| VarNote vs. BEDOPS   | A375_chip vs. Cistrome_TF | 124.04                    | 80.70                           | 0.65    |
| VarNote vs. BEDTools | A375_chip vs. Cistrome_TF | 124.04                    | 230.20                          | 1.86    |

|                      |                             |         |           |         |
|----------------------|-----------------------------|---------|-----------|---------|
| VarNote vs. GIGGLE   | A375_chip vs. Cistrome_TF   | 124.04  | 2345.14   | 18.91   |
| VarNote vs. VEP      | A375_chip vs. Cistrome_TF   | 124.04  | 2123.99   | 17.12   |
| VarNote vs. vcfanno  | A375_chip vs. Cistrome_TF   | 124.04  | 892.76    | 7.20    |
| VarNote vs. BCFtools | A375_chip vs. dbNSFP        | 8.71    | 546.31    | 62.72   |
| VarNote vs. BEDOPS   | A375_chip vs. dbNSFP        | 8.71    | 509.24    | 58.47   |
| VarNote vs. BEDTools | A375_chip vs. dbNSFP        | 8.71    | 1268.80   | 145.67  |
| VarNote vs. GIGGLE   | A375_chip vs. dbNSFP        | 8.71    | 441.38    | 50.68   |
| VarNote vs. VEP      | A375_chip vs. dbNSFP        | 8.71    | 1799.69   | 206.62  |
| VarNote vs. vcfanno  | A375_chip vs. dbNSFP        | 8.71    | 1715.83   | 197.00  |
| VarNote vs. BCFtools | NA12878_Amp vs. CADD_anno   | 49.66   | 22689.00  | 456.89  |
| VarNote vs. BEDOPS   | NA12878_Amp vs. CADD_anno   | 49.66   | 21680.00  | 436.57  |
| VarNote vs. BEDTools | NA12878_Amp vs. CADD_anno   | 49.66   | 75198.00  | 1514.26 |
| VarNote vs. GIGGLE   | NA12878_Amp vs. CADD_anno   | 49.66   | 151.46    | 3.05    |
| VarNote vs. VEP      | NA12878_Amp vs. CADD_anno   | 49.66   | 5637.00   | 113.51  |
| VarNote vs. vcfanno  | NA12878_Amp vs. CADD_anno   | 49.66   | 27697.00  | 557.73  |
| VarNote vs. BCFtools | NA12878_Amp vs. CADD_score  | 19.18   | 3232.38   | 168.53  |
| VarNote vs. BEDOPS   | NA12878_Amp vs. CADD_score  | 19.18   | 3200.88   | 166.89  |
| VarNote vs. BEDTools | NA12878_Amp vs. CADD_score  | 19.18   | 6362.00   | 331.70  |
| VarNote vs. GIGGLE   | NA12878_Amp vs. CADD_score  | 19.18   | 97.80     | 5.10    |
| VarNote vs. VEP      | NA12878_Amp vs. CADD_score  | 19.18   | 481.52    | 25.11   |
| VarNote vs. vcfanno  | NA12878_Amp vs. CADD_score  | 19.18   | 2871.12   | 149.69  |
| VarNote vs. BCFtools | NA12878_Amp vs. Cistrome_TF | 17.42   | 102.88    | 5.91    |
| VarNote vs. BEDOPS   | NA12878_Amp vs. Cistrome_TF | 17.42   | 94.41     | 5.42    |
| VarNote vs. BEDTools | NA12878_Amp vs. Cistrome_TF | 17.42   | 223.01    | 12.80   |
| VarNote vs. GIGGLE   | NA12878_Amp vs. Cistrome_TF | 17.42   | 218.17    | 12.52   |
| VarNote vs. VEP      | NA12878_Amp vs. Cistrome_TF | 17.42   | 238.72    | 13.70   |
| VarNote vs. vcfanno  | NA12878_Amp vs. Cistrome_TF | 17.42   | 400.80    | 23.01   |
| VarNote vs. BCFtools | NA12878_Amp vs. dbNSFP      | 17.62   | 573.18    | 32.53   |
| VarNote vs. BEDOPS   | NA12878_Amp vs. dbNSFP      | 17.62   | 539.58    | 30.62   |
| VarNote vs. BEDTools | NA12878_Amp vs. dbNSFP      | 17.62   | 1340.92   | 76.10   |
| VarNote vs. GIGGLE   | NA12878_Amp vs. dbNSFP      | 17.62   | 58.25     | 3.31    |
| VarNote vs. VEP      | NA12878_Amp vs. dbNSFP      | 17.62   | 714.00    | 40.52   |
| VarNote vs. vcfanno  | NA12878_Amp vs. dbNSFP      | 17.62   | 1192.21   | 67.66   |
| VarNote vs. BCFtools | NA12878_WES vs. CADD_anno   | 352.47  | 22544.00  | 63.96   |
| VarNote vs. BEDOPS   | NA12878_WES vs. CADD_anno   | 352.47  | 21747.00  | 61.70   |
| VarNote vs. BEDTools | NA12878_WES vs. CADD_anno   | 352.47  | 74965.00  | 212.68  |
| VarNote vs. GIGGLE   | NA12878_WES vs. CADD_anno   | 352.47  | 1153.61   | 3.27    |
| VarNote vs. VEP      | NA12878_WES vs. CADD_anno   | 352.47  | 29828.00  | 84.63   |
| VarNote vs. vcfanno  | NA12878_WES vs. CADD_anno   | 352.47  | 102118.00 | 289.72  |
| VarNote vs. BCFtools | NA12878_WES vs. CADD_score  | 142.37  | 2917.42   | 20.49   |
| VarNote vs. BEDOPS   | NA12878_WES vs. CADD_score  | 142.37  | 3212.17   | 22.56   |
| VarNote vs. BEDTools | NA12878_WES vs. CADD_score  | 142.37  | 6048.00   | 42.48   |
| VarNote vs. GIGGLE   | NA12878_WES vs. CADD_score  | 142.37  | 694.71    | 4.88    |
| VarNote vs. VEP      | NA12878_WES vs. CADD_score  | 142.37  | 2400.67   | 16.86   |
| VarNote vs. vcfanno  | NA12878_WES vs. CADD_score  | 142.37  | 10201.37  | 71.65   |
| VarNote vs. BCFtools | NA12878_WES vs. Cistrome_TF | 87.26   | 102.22    | 1.17    |
| VarNote vs. BEDOPS   | NA12878_WES vs. Cistrome_TF | 87.26   | 95.09     | 1.09    |
| VarNote vs. BEDTools | NA12878_WES vs. Cistrome_TF | 87.26   | 218.88    | 2.51    |
| VarNote vs. GIGGLE   | NA12878_WES vs. Cistrome_TF | 87.26   | 1383.11   | 15.85   |
| VarNote vs. VEP      | NA12878_WES vs. Cistrome_TF | 87.26   | 1066.25   | 12.22   |
| VarNote vs. vcfanno  | NA12878_WES vs. Cistrome_TF | 87.26   | 827.16    | 9.48    |
| VarNote vs. BCFtools | NA12878_WES vs. dbNSFP      | 21.38   | 515.86    | 24.13   |
| VarNote vs. BEDOPS   | NA12878_WES vs. dbNSFP      | 21.38   | 530.14    | 24.80   |
| VarNote vs. BEDTools | NA12878_WES vs. dbNSFP      | 21.38   | 1255.68   | 58.73   |
| VarNote vs. GIGGLE   | NA12878_WES vs. dbNSFP      | 21.38   | 242.23    | 11.33   |
| VarNote vs. VEP      | NA12878_WES vs. dbNSFP      | 21.38   | 1807.31   | 84.53   |
| VarNote vs. vcfanno  | NA12878_WES vs. dbNSFP      | 21.38   | 1562.93   | 73.10   |
| VarNote vs. BCFtools | NA12878_WGS vs. CADD_anno   | 1960.29 | 25960.75  | 13.24   |
| VarNote vs. BEDOPS   | NA12878_WGS vs. CADD_anno   | 1960.29 | 21744.00  | 11.09   |
| VarNote vs. BEDTools | NA12878_WGS vs. CADD_anno   | 1960.29 | 75880.00  | 38.71   |
| VarNote vs. GIGGLE   | NA12878_WGS vs. CADD_anno   | 1960.29 | 13855.00  | 7.07    |
| VarNote vs. VEP      | NA12878_WGS vs. CADD_anno   | 1960.29 | 331010.00 | 168.86  |
| VarNote vs. vcfanno  | NA12878_WGS vs. CADD_anno   | 1960.29 | 98069.00  | 50.03   |
| VarNote vs. BCFtools | NA12878_WGS vs. CADD_score  | 1004.61 | 3510.78   | 3.49    |
| VarNote vs. BEDOPS   | NA12878_WGS vs. CADD_score  | 1004.61 | 3257.67   | 3.24    |
| VarNote vs. BEDTools | NA12878_WGS vs. CADD_score  | 1004.61 | 6191.00   | 6.16    |
| VarNote vs. GIGGLE   | NA12878_WGS vs. CADD_score  | 1004.61 | 7950.00   | 7.91    |
| VarNote vs. VEP      | NA12878_WGS vs. CADD_score  | 1004.61 | 28902.00  | 28.77   |
| VarNote vs. vcfanno  | NA12878_WGS vs. CADD_score  | 1004.61 | 15361.17  | 15.29   |

|                      |                             |        |          |        |
|----------------------|-----------------------------|--------|----------|--------|
| VarNote vs. BCFtools | NA12878_WGS vs. Cistrome_TF | 951.34 | 255.86   | 0.27   |
| VarNote vs. BEDOPS   | NA12878_WGS vs. Cistrome_TF | 951.34 | 218.20   | 0.23   |
| VarNote vs. BEDTools | NA12878_WGS vs. Cistrome_TF | 951.34 | 535.84   | 0.56   |
| VarNote vs. GIGGLE   | NA12878_WGS vs. Cistrome_TF | 951.34 | 14432.00 | 15.17  |
| VarNote vs. VEP      | NA12878_WGS vs. Cistrome_TF | 951.34 | 13163.00 | 13.84  |
| VarNote vs. vcfanno  | NA12878_WGS vs. Cistrome_TF | 951.34 | 981.81   | 1.03   |
| VarNote vs. BCFtools | NA12878_WGS vs. dbNSFP      | 76.03  | 727.30   | 9.57   |
| VarNote vs. BEDOPS   | NA12878_WGS vs. dbNSFP      | 76.03  | 627.57   | 8.25   |
| VarNote vs. BEDTools | NA12878_WGS vs. dbNSFP      | 76.03  | 1310.52  | 17.24  |
| VarNote vs. GIGGLE   | NA12878_WGS vs. dbNSFP      | 76.03  | 2652.47  | 34.89  |
| VarNote vs. VEP      | NA12878_WGS vs. dbNSFP      | 76.03  | 11439.00 | 150.45 |
| VarNote vs. vcfanno  | NA12878_WGS vs. dbNSFP      | 76.03  | 1704.22  | 22.42  |

---

**Supplemental Table S4.** The running parameters used in the evaluation of variant-level annotation

| Tool     | Database dataset | Database format | Extracted Features                                                                             | Command line                                                                                                                                                                 |
|----------|------------------|-----------------|------------------------------------------------------------------------------------------------|------------------------------------------------------------------------------------------------------------------------------------------------------------------------------|
| BCFtools | dbNSFP           | BED             | SIFT_score,<br>Polyphen2_HDIV_score,<br>MutationAssessor_score,<br>M-CAP_score,<br>REVEL_score | bctools annotate -a {DATABASE FILE} -c {BED FIELDS} -h {HEADER LINES} --threads {THREADS} {QUERY FILE}                                                                       |
|          | gnomAD           | VCF             | AF, AN, GC, CSQ                                                                                | bctools annotate -a {DATABASE FILE} -c {FIELDS} --threads {THREADS} {QUERY FILE}                                                                                             |
|          | CADD_anno        | BED             | GerpRS, fitCons,<br>RawScore, PHRED                                                            | bctools annotate -a {DATABASE FILE} -c {BED FIELDS} -h {HEADER LINES} --threads {THREADS} {QUERY FILE}                                                                       |
| VarNote  | dbNSFP           | BED             | SIFT_score,<br>Polyphen2_HDIV_score,<br>MutationAssessor_score,<br>M-CAP_score,<br>REVEL_score | java -jar VarNote.jar Annotation -Q {QUERY FILE} -D:db.mode=1 {DATABASE FILE} -T {THREADS} -A {FIELDS}                                                                       |
|          | gnomAD           | VCF             | AF, AN, GC, CSQ                                                                                |                                                                                                                                                                              |
|          | CADD_anno        | BED             | GerpRS, fitCons,<br>RawScore, PHRED                                                            |                                                                                                                                                                              |
| vcfanno  | dbNSFP           | BED             | SIFT_score,<br>Polyphen2_HDIV_score,<br>MutationAssessor_score,<br>M-CAP_score,<br>REVEL_score | vcfanno -p {THREADS} {CONFIGURE FILE} {QUERY FILE}                                                                                                                           |
|          | gnomAD           | VCF             | AF, AN, GC, CSQ                                                                                |                                                                                                                                                                              |
|          | CADD_anno        | BED             | GerpRS, fitCons,<br>RawScore, PHRED                                                            |                                                                                                                                                                              |
| VEP      | dbNSFP           | BED             | SIFT_score,<br>Polyphen2_HDIV_score,<br>MutationAssessor_score,<br>M-CAP_score,<br>REVEL_score | vcp --dir {VEP DATABASE} --assembly GRCh37 --vcf --format vcf -i {QUERY FILE} -custom {DATABASE FILE},{DATABASE ID},bed,exact,0 --offline --fork {THREADS}                   |
|          | gnomAD           | VCF             | AF, AN, GC                                                                                     | vcp --dir {VEP DATABASE} --assembly GRCh37 --vcf --format vcf -i {QUERY FILE} -custom {DATABASE FILE},{DATABASE ID},vcf,exact,0,{DATABASE FIELDS} --offline --fork {THREADS} |
|          | CADD_anno        | BED             | GerpRS, fitCons,<br>RawScore, PHRED                                                            | vcp --dir {VEP DATABASE} --assembly GRCh37 --vcf --format vcf -i {QUERY FILE} -custom {DATABASE FILE},{DATABASE ID},bed,exact,0 --offline --fork {THREADS}                   |

**Supplemental Table S5.** The curation list of rare pathogenic regulatory variants and experimental validation evidence

| CHR | POS       | rsID        | REF | ALT | Disease                                               | Functional Assays                                                      | Molecular Effect                                                                                                                    | Source                   | PMID     |
|-----|-----------|-------------|-----|-----|-------------------------------------------------------|------------------------------------------------------------------------|-------------------------------------------------------------------------------------------------------------------------------------|--------------------------|----------|
| 1   | 11905784  | rs12565     | T   | G   | Familial atrial fibrillation                          | EMSA, luciferase reporter assay (HEK293)                               | decreases binding affinity for REST to prompt NPPA expression                                                                       | HGMD                     | 22496669 |
| 1   | 101184877 | rs3783605   | A   | G   | Thromboembolic diseases, asthma, and multiple myeloma | ChIP (EBV-transformed lymphoblast), luciferase reporter assay (Jurkat) | increases binding affinity for ETS2                                                                                                 | HGMD                     | 17431880 |
| 1   | 209878286 | rs13306421  | G   | A   | Metabolic syndrome                                    | luciferase reporter assay (CHO)                                        | prompts HSD11B1 expression                                                                                                          | HGMD                     | 19934376 |
| 3   | 9791918   | rs56387615  | G   | C   | Gastric cancer                                        | luciferase reporter assay (HEK293, HeLa)                               | decreases promoter activity to repress OGG1 expression                                                                              | HGMD                     | 21822670 |
| 3   | 9791948   | rs1801129   | A   | G   | Type 2 diabetes mellitus (T2DM)                       | luciferase reporter assay (HeLa, HEK293)                               | decreases promoter activity to repress OGG1 expression                                                                              | HGMD                     | 20562008 |
| 3   | 9791953   | rs1801126   | G   | T   | Type II epithelial ovarian cancer (EOC)               | luciferase reporter assay (HEK293)                                     | represses OGG1 expression                                                                                                           | HGMD                     | 21997177 |
| 3   | 37035012  | rs587779001 | C   | A   | Lynch syndrome                                        | luciferase reporter assay (HEK293)                                     | represses MLH1 expression                                                                                                           | ClinVar, Genomiser       | 21840485 |
| 5   | 147211355 | rs191068215 | C   | T   | Chronic pancreatitis                                  | luciferase reporter assay (AR42J, 266-6, HEK293T)                      | decreases promoter activity to repress SPINK1 expression                                                                            | NCBoost, HGMD            | 25792561 |
| 6   | 1610252   | rs77888940  | C   | G   | Primary congenital glaucoma                           | luciferase reporter assay (HEK293T)                                    | increases protein levels and transactivation activity of FOXC1 by disrupt a consensus sequence for a terminal oligopyrimidine tract | ClinVar, Genomiser       | 26220699 |
| 6   | 88299677  | rs201150141 | T   | C   | Pontocerebellar hypoplasia                            | luciferase reporter assay (HEK293T)                                    | decreases promoter activity to repress RARS2 expression                                                                             | ClinVar, Genomiser, CDTS | 25809939 |
| 11  | 5248393   | rs34883338  | G   | A   | Familial hypercholesterolemia                         | luciferase reporter assay (HepG2), EMSA (SL-2)                         | decreases binding affinity for Sp1 and decreases promoter activity to repress LDLR                                                  | NCBoost, HGMD, CDTS      | 11792717 |
| 11  | 102596480 | rs11225395  | A   | C   | Preterm premature rupture of the membranes            | luciferase reporter assay (BeWo, HTR-8/Svneo, JEG-3), EMSA (BeWo)      | decreases binding affinity for unknown TF(s) and increases promoter activity to prompts MMP8 expression                             | HGMD                     | 15367487 |
| 12  | 52308396  | rs201378973 | G   | C   | Hereditary hemorrhagic telangiectasia (HHT)           | luciferase reporter assay (HUVEC), EMSA (HUVEC)                        | decreases binding affinity for Sp1 to repress ACVRL1 expression                                                                     | NCBoost                  | 23460919 |
| 16  | 67520735  | rs8047574   | C   | T   | Low body fatness                                      | luciferase reporter assay (NCI-h295R)                                  | increases promoter activity to prompt AGRP expression                                                                               | HGMD                     | 15121772 |
| 16  | 72088461  | rs5471      | A   | C   | Ahaptoglobinaemia                                     | luciferase reporter assay (HepG2)                                      | decreases promoter activity to repress HP expression                                                                                | HGMD                     | 14616769 |

|    |          |             |   |   |                                                        |                                                         |                                                                                                                                                 |                                |          |
|----|----------|-------------|---|---|--------------------------------------------------------|---------------------------------------------------------|-------------------------------------------------------------------------------------------------------------------------------------------------|--------------------------------|----------|
| 17 | 69108655 | rs1859961   | A | G | Prostate cancer                                        | ChIP (LNCaP),<br>luciferase reporter assayq<br>(LNCaP)  | decreases binding affinity for<br>FOXA1, increases binding<br>affinity for AP-1 and increases<br>enhancer activity to prompt<br>SOX9 expression | HGMD                           | 22665440 |
| 19 | 49468616 | rs398124638 | G | C | Hereditary<br>hyperferritinaemia-<br>cataract syndrome | EMSA (K562)                                             | decreases binding affinity for<br>iron-regulatory proteins                                                                                      | ClinVar,<br>Genomiser,<br>CDTS | 10759702 |
| 20 | 23030292 | rs16984852  | C | A | Venous thrombosis                                      | luciferase reporter assay<br>(HUVECs, HEK293,<br>COS-7) | repress THBD expression                                                                                                                         | ClinVar,<br>Genomiser          | 23332921 |

**Supplemental Table S6.** The pseudocode of VarNote random-sweep searching algorithm

**Main:**

```
read input file
map input queries into groups according to given CPU threads
foreach group do
    SearchInGroup
end
reduce group results to final output
```

**SearchInGroup:**

```
foreach query in group do
    foreach database do
        SearchHitsInDatabase
    end
    merge hits for each query
end
```

**SearchHitsInDatabase:**

```
if query is first read in chromosome then
    foreach database do
        loadIndexForChr
    end

    foreach SROB in index do
        if query.end < SROB.min then nextBlock
        elseif query.beg <= SROB.max then do
            SearchHitsInBlock
        break loop
    end
```

**SearchHitsInBlock:**

```
foreach linklist.record in linklist do
    if linklist.record.end < query.beg then remove linklist.record from linklist
    elseif linklist.record.beg < query.end then RandomAccessAnno from linklist.record
end

while (next ROB in Block from pointer is not null)
do
    if ROB.record.end <= query.beg then continue
    elseif ROB.record.beg < query.end then RandomAccessAnno and put ROB.record into
linklist
    else set a pointer to current ROB
end
```

- \* **loadIndexForChr:** will load all SROBs for current chromosome from index file
- \* **RandomAccessAnno:** will randomly access annotations from OB of database file



## Supplemental Codes

**Supplemental\_Code.zip:** The file contains all scripts and source codes for methods evaluation, manuscript results and software functions.

All latest source code and scripts for methods evaluation and manuscript results are also available at <https://github.com/mulinlab/VarNote>
